# Supplementary material for: Characterization of the biological processes shaping the genetic structure of the Italian population
Source: PubMed Central journal article supplement (PMC4640365; doi:10.1186/s12863-015-0293-x), 2015-11-09
Supplement: 12863_2015_293_MOESM4_ESM.pdf [file 12863_2015_293_MOESM4_ESM.pdf]

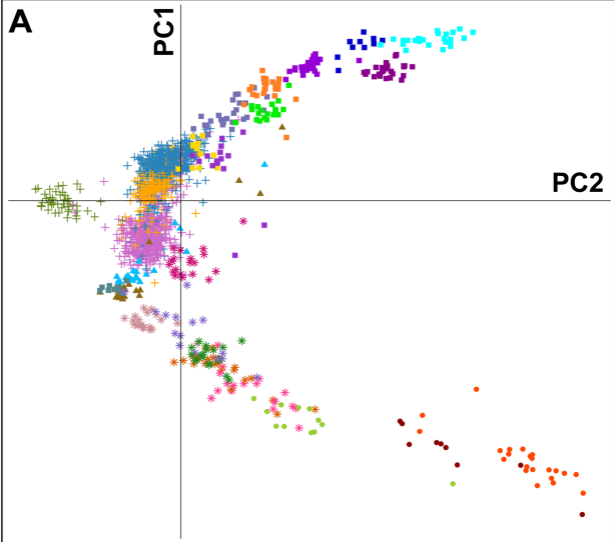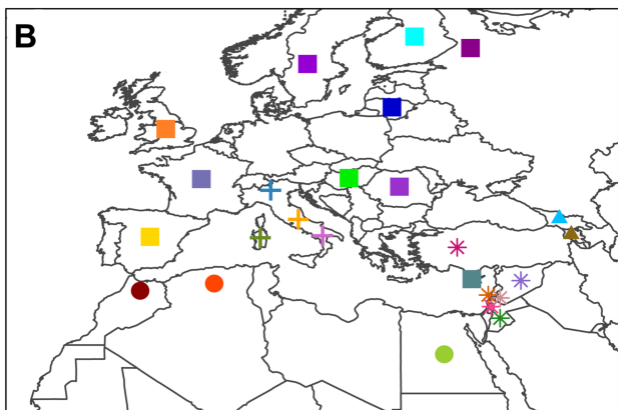

- |                 |             |             |
|-----------------|-------------|-------------|
| + North Italy   | * Jordan    | ■ Lithuania |
| + Central Italy | * Palestine | ■ Romania   |
| + South Italy   | * Syria     | ■ Russia    |
| + Sardinia      | * Turkey    | ■ Spain     |
| ● Egypt         | ■ France    | ■ Sweden    |
| ● Morocco       | ■ Cyprus    | ▲ Armenia   |
| ● Mozabite      | ■ England   | ▲ Georgia   |
| * Bedouin       | ■ Finland   |             |
| * Druze         | ■ Hungary   |             |
