# Supplementary material for: Characterization of the biological processes shaping the genetic structure of the Italian population
Source: PubMed Central journal article supplement (PMC4640365; doi:10.1186/s12863-015-0293-x), 2015-11-09

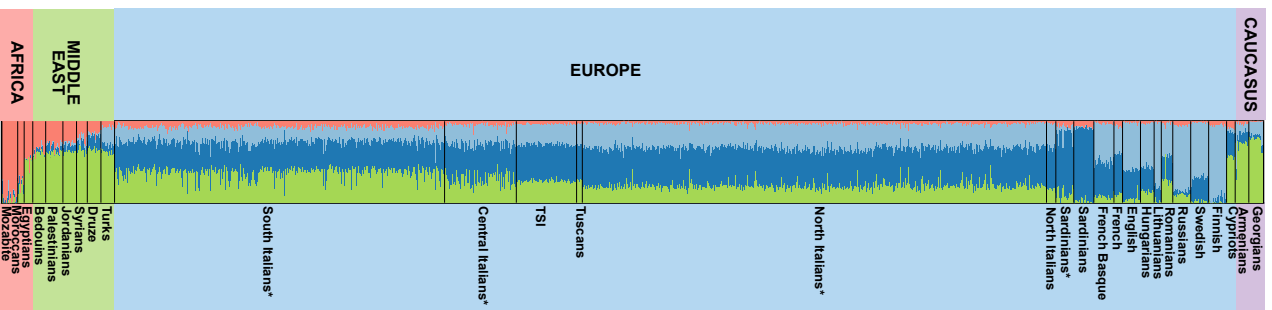

Supplement: 12863_2015_293_MOESM5_ESM.pdf [file 12863_2015_293_MOESM5_ESM.pdf]
