# Supplementary material for: Characterization of the biological processes shaping the genetic structure of the Italian population
Source: PubMed Central journal article supplement (PMC4640365; doi:10.1186/s12863-015-0293-x), 2015-11-09
Supplement: 12863_2015_293_MOESM6_ESM.pdf [file 12863_2015_293_MOESM6_ESM.pdf]

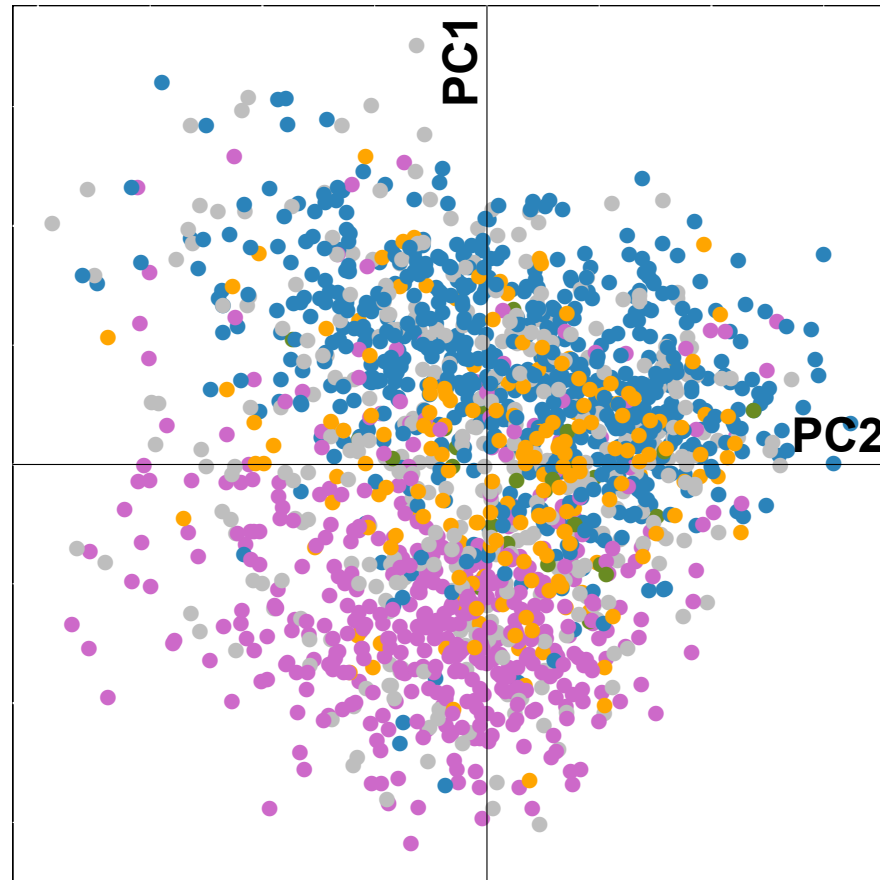

**Additional File 6. PCA of the Italian dataset using the 270 PC1-associated SNPs.** Plot of the first two principal components showing that the 270 SNPs recreate the genetic latitudinal gradient observed in Italy.
